# Supplementary material
Source: MDPI journal article supplement (https://www.mdpi.com/1996-1073/11/10/2809)
Supplement: s1 [file s1]

## Sheet: Arrival Time of EVs
Aggregator	Time Slots
AG01	200	237	259	214	238	216	230	257	231	203	207	224	223	207	232	258	222	223	175	209	195	219	241	265	271	225	220	248	240	246	247	192	241	226	210	211	259	209	198	233	276	229	235	205	268	231	241	205	248
AG02	256	247	235	228	237	313	225	191	274	243	212	291	241	235	209	202	186	218	203	244	220	270	264	232	221
AG03	256	200	244	212	218	212	242	209	202	241	218	237	220	234	166	239	272	253	250	222	232	234	230	208	220	224	216	248	289	196	231	193	259	262	188	275	202	233	254	232	283	294	231	182	219	208	210	201	230
AG04	240	253	249	219	238	221	206	243	230	224	235	252	237	233	235	229	209	247	262	215	274	224	222	206	209	205	236	266	241	249	260	168	224	236	245	197	204	247	225	241	205	189	246	257	267	191	196	193	227
AG05	260	205	233	213	240	228	227	299	213	227	292	200	241	202	253	236	244	221	234	263	173	189	238	212	221	192	206	218	211	207	218	205	260	204	272	219
AG06	193	213	250	253	232	235	243	193	214	184	217	251	245	283	232	176	269	259	214	233	247	237	245	225	227	230	209	262	228	244	207	202	226	222	257	243	241	193	205	233	220	259	260	214	249	261	236
AG07	267	253	233	249	233	218	237	229	219	271	233	294	221	242	266	294	235	209	247	196	221	235	264	262	227	250	220	244	274	232	221	216	245	260	279	229	232	213	267	226	217	280	247	245	204	238	240	202	223
AG08	224	229	239	259	243	221	242	222	185	172	187	222	213	211	229	212	213	243	247	286	235	229	214	223	227	186	222	246	214	240	252	254	247	174	214	250	237	228	238	255	232	210	224	223	250	238	241	232	219
AG09	239	228	210	238	209	249	230	189	170	221	255	232	229	245	195	262	207	229	219	232	181	265	241	276	262	228	205	186	228	233	253	205	247	230	209	247	234	222	273	243	225	235	230	232	239	214	209	237	273
AG11	227	217	230	206	182	227	199	182	285	222	238	257	188	238	240	230	232	215	245	208
AG11	209	245	268	219	216	238	254	251	234	213	243	226	261	194	231	259	216	213	206	221	223	231	207	230	214	219	208	221	314	310	256	247	197	214	213	241	240	231	220	206	228	255	238	232	244	242	189	228	218
[truncated: 235 more columns]

## Sheet: Departure Time of EVs
Aggregator	Time Slots
AG01	96	105	100	105	101	101	97	97	97	103	99	106	106	108	102	99	99	102	105	100	102	104	107	98	105	103	101	107	101	98	104	103	100	106	108	108	98	99	96	103	97	101	107	103	100	99	101	107	97
AG02	103	107	106	107	103	103	106	96	107	101	96	105	98	98	103	99	100	101	101	101	103	98	98	97	100
AG03	105	99	105	104	106	106	100	100	102	100	106	106	103	99	104	99	101	101	102	108	105	108	99	102	97	105	103	106	108	107	101	96	102	98	99	100	97	105	105	103	100	106	103	107	107	100	103	100	103
AG04	101	105	105	100	105	107	99	98	99	100	99	107	97	103	98	106	98	102	108	100	97	99	101	100	99	107	104	108	101	107	96	103	106	99	107	105	106	103	106	100	99	100	103	106	99	101	106	103	108
AG05	107	108	104	97	96	103	103	108	105	104	102	99	108	102	96	104	102	97	107	100	99	97	100	99	104	97	99	99	107	101	105	103	105	97	108	106
AG06	97	102	100	104	99	103	103	103	101	96	102	101	97	102	101	103	106	104	106	97	99	102	108	105	101	100	97	105	102	98	101	98	105	100	107	96	106	104	102	104	105	97	107	96	100	98	107
AG07	97	103	104	104	106	97	106	102	104	99	103	104	107	101	97	97	104	106	104	100	107	102	107	97	98	105	107	105	100	98	106	105	99	99	100	106	106	103	103	99	104	106	101	101	102	99	104	107	107
AG08	102	103	103	104	96	102	96	106	100	106	99	103	107	97	97	96	104	103	97	106	103	97	97	98	105	97	99	99	97	106	104	105	104	102	100	104	97	98	96	108	108	97	102	104	99	105	103	101	99
AG09	104	107	102	108	98	97	100	101	101	100	104	97	101	100	100	97	103	99	98	96	99	103	106	97	107	98	106	106	107	98	102	101	98	103	103	99	102	108	102	104	101	96	100	106	100	97	102	100	105
AG11	100	107	99	100	101	104	98	106	97	102	96	105	104	99	104	103	106	103	107	101
AG11	100	102	99	107	102	99	101	104	101	98	106	103	100	99	99	102	101	105	97	106	104	98	106	98	103	103	98	96	105	105	101	97	103	98	105	102	99	107	105	107	97	98	105	104	105	102	101	103	106
[truncated: 235 more columns]

## Sheet: Driving Distance of EVs
Aggregator	Driving distance (km)
AG01	36.1332	55.0229	20.3883	31.1466	39.4489	81.557	48.8526	30.0551	33.8641	32.6618	67.4173	32.5722	21.4615	44.0696	36.7273	56.1718	59.8117	62.6076	52.973	52.6528	80.4818	13.3954	31.1939	1.67808	58.9346	39.2715	32.2444	1.10975	42.8172	33.1119	9.13012	13.452	22.1125	33.3184	2.69209	34.8144	52.2836	30.5508	23.513	45.4603	62.9137	29.0193	28.579	7.35553	17.388	52.0691	36.311	55.5439	53.4708
AG02	39.3418	38.1848	41.8739	44.0031	24.0931	15.9145	59.9503	33.9873	69.7783	18.5603	25.7883	69.9259	69.6266	16.2649	43.3226	68.1703	67.9865	10.6608	74.2424	53.29	43.7789	33.8599	17.6447	40.8809	33.1776
AG03	89.3919	42.9623	35.0025	38.4928	25.381	84.1724	52.7508	40.4402	63.3996	38.0745	36.6593	26.61	25.3206	73.9397	55.6301	40.7038	76.1255	39.3176	45.1519	7.70421	49.2085	7.10371	17.1567	59.5914	46.4918	19.697	30.081	44.4159	43.6186	1.31945	12.394	0.0268089	37.2124	1.10758	54.1712	16.7803	14.5693	78.0133	86.1562	20.8578	37.9886	81.7898	26.9682	76.4133	56.7538	40.0159	31.0666	75.88	54.372
AG04	50.4475	22.1633	46.4209	23.5181	83.023	0.48202	24.3568	55.6948	20.8345	39.1918	53.1343	66.3436	18.4969	35.0797	28.4704	36.2983	46.8918	25.2523	56.3225	48.1446	28.456	44.8433	60.3546	60.5491	53.4338	37.3765	25.2198	43.7079	28.5916	31.5273	59.0534	70.4899	51.8487	83.7666	5.30942	39.2969	40.8867	74.1581	49.7779	31.7079	50.9373	52.8695	42.7995	5.60173	61.2055	37.6648	41.1978	4.82584	31.0231
AG05	54.0113	35.2357	41.0245	38.4089	17.7688	64.4844	30.8005	28.6513	43.0703	37.3339	27.3785	41.5835	85.0751	50.6541	24.4536	19.7573	33.5681	4.28588	78.784	43.2735	13.3216	41.4414	7.18695	51.5534	34.8259	39.72	46.7243	57.4964	21.066	6.67159	36.5247	20.7782	48.1071	1.81759	57.6028	45.51
AG06	14.4568	31.8524	57.1492	91.9396	31.1111	69.065	19.9516	43.3309	34.2558	46.2516	27.8913	7.67146	32.87	48.4286	27.7155	34.7628	47.6038	50.6091	22.7343	32.9227	57.8661	46.0437	9.28106	72.6984	25.2957	23.5013	7.62327	36.3991	36.5506	31.7325	20.413	2.43393	104.773	71.6684	30.9381	36.2841	46.6599	38.5342	26.3091	59.2554	13.8709	81.6635	0.185275	31.719	57.9098	41.3823	5.8831
AG07	58.9882	42.3751	20.9587	47.6413	55.3598	86.6392	36.7462	32.3569	27.7448	3.40128	50.2182	6.1916	32.8906	32.7768	57.3087	21.8889	58.9058	27.4283	10.483	38.6091	43.9104	29.5101	6.61907	65.2206	43.1218	23.3194	65.4384	46.841	11.0414	52.401	0.520456	15.6333	42.1188	47.8067	40.3439	3.53328	56.73	66.4325	64.3648	26.3098	30.1736	16.5182	44.2795	44.3215	21.9046	58.938	57.4623	53.1911	22.2991
AG08	34.492	19.3059	58.7454	38.5314	40.3946	59.3732	53.5877	56.0127	7.90702	43.6165	59.9617	46.4649	58.5498	85.254	66.144	14.2022	20.6211	36.133	24.7273	37.071	65.6957	27.1631	32.5343	33.8154	53.5721	61.5068	35.5268	31.8559	59.2457	54.6399	49.4912	110.33	39.4942	46.2739	36.9707	52.2996	27.3025	60.8688	78.8573	40.6678	37.3037	26.4601	28.4287	1.49259	37.6235	19.4986	66.304	42.2129	40.003
AG09	33.5121	0.934212	28.1075	62.0224	27.0144	77.7237	21.7285	22.3099	16.1744	64.2881	26.0957	47.9389	2.70606	26.2584	53.2372	10.7592	39.8977	50.81	77.748	52.8398	59.5328	31.0418	26.1239	40.0368	19.2362	63.3735	55.7907	59.8787	66.4112	36.4366	26.1602	50.3114	64.0279	57.5985	59.5081	71.7843	45.2679	65.1697	38.5406	56.0901	8.06155	72.5721	0.0704585	43.3039	31.218	13.4183	46.1546	46.0761	69.7055
AG11	49.9192	32.0132	30.1633	32.8927	36.8699	38.9758	94.2463	12.011	15.3287	44.1887	37.6916	22.8097	45.961	55.2905	13.5335	29.8677	10.5948	40.6304	42.3872	53.7484
AG11	15.0085	45.3151	35.6615	69.2838	45.5178	27.0357	33.7864	27.0568	70.3146	27.6069	3.6103	34.3928	63.8427	53.3261	42.3934	77.9004	25.9291	44.4729	19.7068	21.5446	31.259	52.9828	83.7854	56.2968	15.3434	34.3071	26.6577	32.3845	64.6471	47.065	60.5155	52.0156	21.4358	59.1849	9.2265	56.3154	51.9321	62.8994	7.70765	34.3404	39.1923	40.9977	57.9922	54.1452	53.0791	42.7098	75.5046	31.6804	41.0151
[truncated: 235 more columns]

## Sheet: Wind Speed
Hour	Min	Speed
0	5	9.747
0	10	9.961
0	15	10.049
0	20	10.046
0	25	10.29
0	30	10.693
0	35	10.632
0	40	10.367
0	45	10.321
0	50	10.373
0	55	10.275
1	0	9.897
1	5	9.616
1	10	9.561
1	15	9.57
1	20	9.61
1	25	9.668
1	30	9.656
1	35	9.759
1	40	9.979
1	45	10.123
1	50	10.061
1	55	9.9
2	0	9.768
2	5	9.927
2	10	9.97
2	15	9.857
2	20	9.787
2	25	9.653
2	30	9.424
2	35	9.289
2	40	9.277
2	45	9.244
2	50	9.299
2	55	9.372
3	0	9.433
3	5	9.552
3	10	9.579
3	15	9.546
3	20	9.57
3	25	9.439
3	30	9.268
3	35	9.179
3	40	9.097
3	45	9.048
3	50	8.853
3	55	8.603
4	0	8.334
4	5	8.127
4	10	8.072
4	15	8.301
4	20	8.703
4	25	9.033
4	30	9.079
4	35	8.856
4	40	8.868
4	45	9.03
4	50	9.283
4	55	9.384
5	0	9.451
5	5	9.448
5	10	9.595
5	15	9.918
5	20	10.15
5	25	10.232
5	30	10.391
5	35	10.644
5	40	10.858
5	45	10.95
5	50	10.898
5	55	10.791
6	0	10.748
6	5	10.62
6	10	10.437
6	15	10.272
6	20	10.293
6	25	10.251
6	30	10.177
6	35	10.132
6	40	9.976
6	45	10.013
6	50	10.226
6	55	10.531
7	0	10.715
7	5	10.837
7	10	10.95
7	15	10.943
7	20	10.953
7	25	11.069
7	30	11.197
7	35	11.267
7	40	11.261
7	45	11.334
7	50	11.49
7	55	11.609
8	0	11.572
8	5	11.481
8	10	11.716
8	15	12.088
8	20	12.112
8	25	12.024
8	30	12.042
8	35	12.149
8	40	12.216
8	45	12.234
8	50	12.317
8	55	12.372
9	0	12.326
9	5	12.21
9	10	12.216
9	15	12.192
9	20	12.115
9	25	11.963
9	30	11.908
9	35	11.981
9	40	12.118
9	45	12.18
9	50	12.146
9	55	12.082
10	0	12.088
10	5	12.189
10	10	12.366
10	15	12.353
10	20	12.28
10	25	12.183
10	30	12.17
10	35	12.134
10	40	12.115
10	45	12.152
10	50	12.112
10	55	12.054
11	0	12.045
11	5	12.033
11	10	12.112
11	15	12.244
11	20	12.146
11	25	11.966
11	30	11.829
11	35	11.685
11	40	11.676
11	45	11.85
11	50	11.835
11	55	11.731
12	0	11.642
12	5	11.551
12	10	11.401
12	15	11.243
12	20	11.172
12	25	11.349
12	30	11.578
12	35	11.554
12	40	11.471
12	45	11.447
12	50	11.499
12	55	11.474
13	0	11.313
13	5	11.093
13	10	10.919
13	15	10.782
13	20	10.434
13	25	10.223
13	30	10.171
13	35	10.309
13	40	10.306
13	45	10.159
13	50	10.107
13	55	10.187
14	0	10.223
14	5	10.272
14	10	10.101
14	15	9.967
14	20	10.077
14	25	10.19
14	30	10.135
14	35	9.961
14	40	9.845
14	45	9.936
14	50	9.887
14	55	9.686
15	0	9.723
15	5	9.875
15	10	9.863
15	15	9.79
15	20	9.704
15	25	9.549
15	30	9.387
15	35	9.466
15	40	9.683
15	45	9.735
15	50	9.845
15	55	9.909
16	0	9.781
16	5	9.555
16	10	9.332
16	15	9.21
16	20	9.146
16	25	9.033
16	30	8.911
16	35	8.923
16	40	8.902
16	45	8.816
16	50	8.777
16	55	8.667
17	0	8.529
17	5	8.465
17	10	8.358
17	15	8.23
17	20	8.081
17	25	8.023
17	30	8.041
17	35	8.084
17	40	8.154
17	45	8.178
17	50	8.096
17	55	7.974
18	0	7.782
18	5	7.531
18	10	7.333
18	15	7.263
18	20	7.205
18	25	7.095
18	30	7.031
18	35	6.918
18	40	6.796
18	45	6.756
18	50	6.827
18	55	7.004
19	0	7.312
19	5	7.589
19	10	7.562
19	15	7.373
19	20	7.315
19	25	7.29
19	30	7.275
19	35	7.217
19	40	7.068
19	45	6.875
19	50	6.738
19	55	6.653
20	0	6.646
20	5	6.692
20	10	6.756
20	15	6.854
20	20	6.909
20	25	6.924
20	30	7.007
20	35	7.181
20	40	7.397
20	45	7.501
20	50	7.48
20	55	7.412
21	0	7.48
21	5	7.657
21	10	7.788
21	15	7.769
21	20	7.754
21	25	7.776
21	30	7.754
21	35	7.751
21	40	7.855
21	45	8.12
21	50	8.294
21	55	8.331
22	0	8.178
22	5	8.084
22	10	8.029
22	15	7.919
22	20	7.821
22	25	7.757
22	30	7.996
22	35	8.569
22	40	9.161
22	45	9.616
22	50	10.074
22	55	10.501
23	0	10.812
23	5	11.657
23	10	12.176
23	15	10.708
23	20	9.811
23	25	9.469
23	30	10.327
23	35	11.404
23	40	11.658
23	45	10.522
23	50	10.785
23	55	11.191
24	0	10.528
